# Supplementary material
Source: PubMed Central journal article supplement (PMC3428914)
Supplement: NIHMS49352-supplement-Supplemental_data.pdf [file NIHMS49352-supplement-Supplemental_data.pdf]

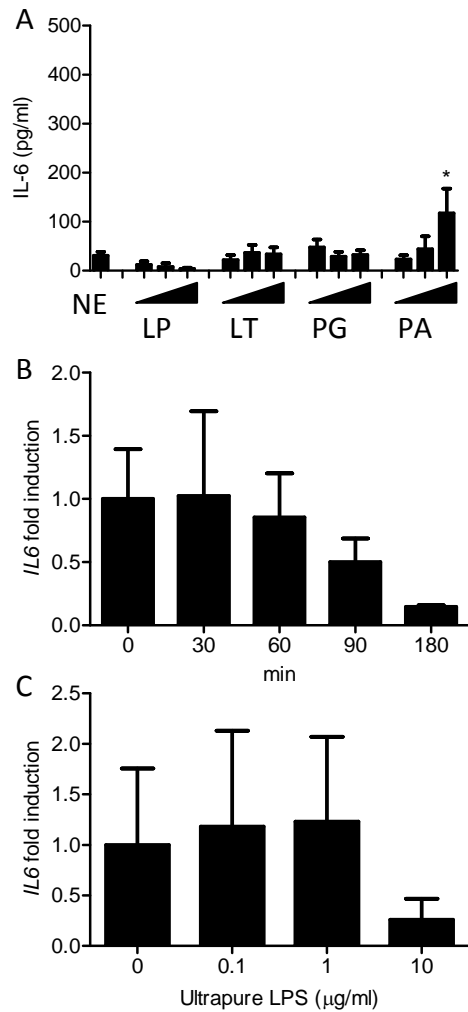

**Supplemental Figure 1. Granulosa cells have limited responsiveness to PAMPs when treated in serum free medium.** Granulosa cells were cultured in serum free conditions for 48 h before PAMP challenge. Accumulation of IL-6 (A) in the supernatants of granulosa cells was measured by ELISA following 24 h in culture with the PAMPs ultrapure lipopolysaccharide (LPS), *lipoteichoic acid* (LTA), peptidoglycan (PGN) or Pam3CSK4 (PAM). Granulosa cells were treated with 0.1, 1 and 10 µg/ml of each PAMP (ranging left to right and represented by triangles). Data are presented as mean + SEM from 4 - 7 independent experiments. Analysis was performed by ANOVA followed by Dunnett's pair-wise post-hoc tests. Alternatively granulosa cells were cultured in serum free medium containing 1 µg/ml of ultrapure LPS for 30, 60, 90 or 180 min to determine time dependent effects of LPS (B) or cultured in serum free medium containing 0.1, 1 or 10 µg/ml of ultrapure LPS for 180 min to determine concentration dependent effects of LPS treatment (C). *IL6* gene expression was measured using real time RT-PCR. Data are represented as mean + SEM fold induction compared with control cells at time 0 from 3 - 4 independent experiments. Fold induction was compared to untreated control within time points; analysis by non-parametric Mann-Whitney U test. \*  $P < 0.05$

**Supplemental Table 1. PCR primer sequence, product size, Genebank ID and siRNA sequence.**

| Gene                           | Genbank ID         | 5' sequence                 | 3' sequence                | Product (bp) |
|--------------------------------|--------------------|-----------------------------|----------------------------|--------------|
| <i>IL6</i>                     | NM_173923.2        | ATGACTTCTGCTTTCCTA<br>CCC   | GCTGCTTTCACACTCATC<br>ATTC | 179          |
| <i>IL8</i>                     | NM_173925.2        | GCAGGTATTTGTGAAGAGA<br>GCTG | CACAGAACATGAGGCAC<br>TGAA  | 177          |
| <i>TLR4</i>                    | NM_174198.6        | AGCCACGGCCATCCTCTCC<br>T    | AGCTCAGGTCCAGCATCT<br>TGGT | 148          |
| <i>AMH</i><br>(56)             | NM_173890.1        | GTGGTGCTGCTGCTAAAGA<br>TG   | TCGGACAGGCTGATGAG<br>GAG   | 104          |
| <i>MHCI</i>                    |                    |                             |                            |              |
| <i>I</i><br>( <i>BLA-DQB</i> ) | NM_00103466<br>8.2 | GAGCGGGTGCGGTACGTG<br>AC    | AGCGCCCGGTACAAGTC<br>CA    | 86           |
| <i>ACTB</i>                    | NM_173979.3        | CAGAAGCACTCGTACGTGG<br>G    | TTGGCCTTAGGGTTCAGG<br>G    | 199          |
| siRN<br>A-<br><i>TLR4</i>      | NM_174198.6        | GAGUAUAUCUUAGGAAGU<br>UU    | ACUUCCUAAAGAUUAC<br>UCUU   |              |

56. Rico C, Medigue C, Fabre S, Jarrier P, Bontoux M, Clement F, Monniaux D 2011 Regulation of anti-Mullerian hormone production in the cow: a multiscale study at endocrine, ovarian, follicular, and granulosa cell levels. *Biol Reprod* 84:560-571
